# Supplementary material for: Insight into the essential role of the Helicobacter pylori HP1043 orphan response regulator: genome-wide identification and characterization of the DNA-binding sites
Source: PubMed Central journal article supplement (PMC5253667; doi:10.1038/srep41063), 2017-01-23
Supplement: srep41063-s1.pdf [file srep41063-s1.pdf]

**Insight into the essential role of the *Helicobacter pylori* HP1043 orphan response regulator: genome-wide identification and characterization of the DNA-binding sites**

**Simone Pellicciari<sup>1,§</sup>, Eva Pinatel<sup>2,§</sup>, Andrea Vannini<sup>1,4</sup>, Clelia Peano<sup>2</sup>, Simone Puccio<sup>2,3</sup>, Gianluca De Bellis<sup>2</sup>, Alberto Danielli<sup>1</sup>, Vincenzo Scarlato<sup>1,\*</sup> and Davide Roncarati<sup>1,\*</sup>**

<sup>1</sup>Department of Pharmacy and Biotechnology (FaBiT), University of Bologna, Italy. <sup>2</sup>Institute of Biomedical Technologies, National Research Council, Segrate, Milan, Italy.

**Supplementary information**

**Figure S1**

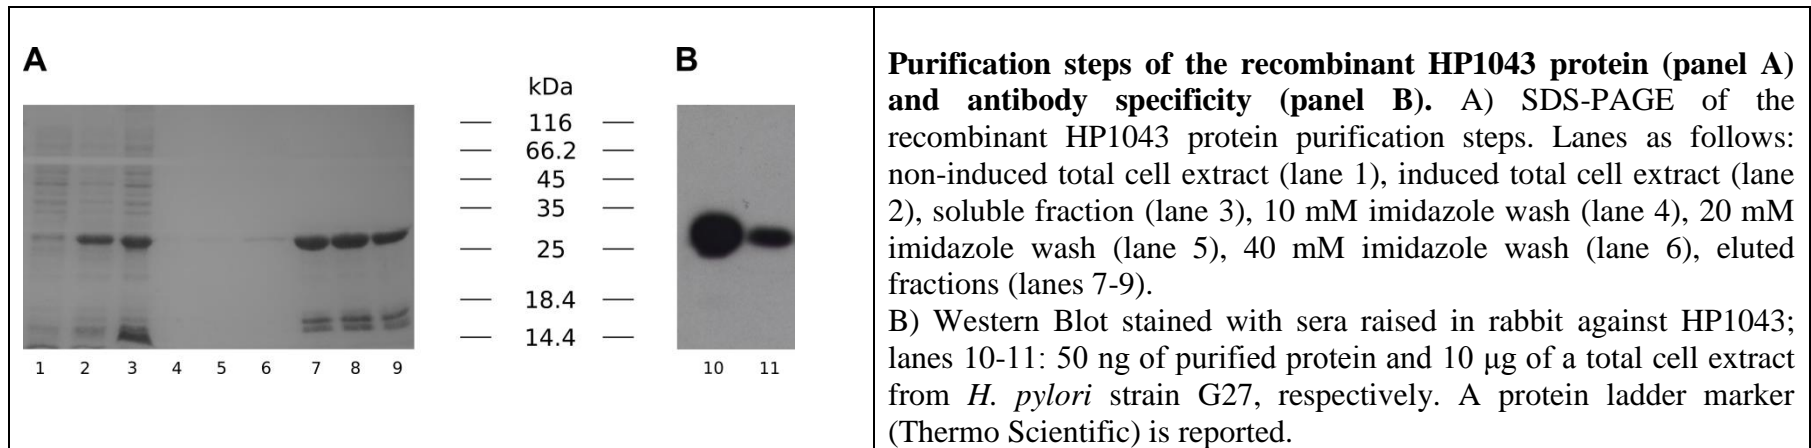

**Figure S2**

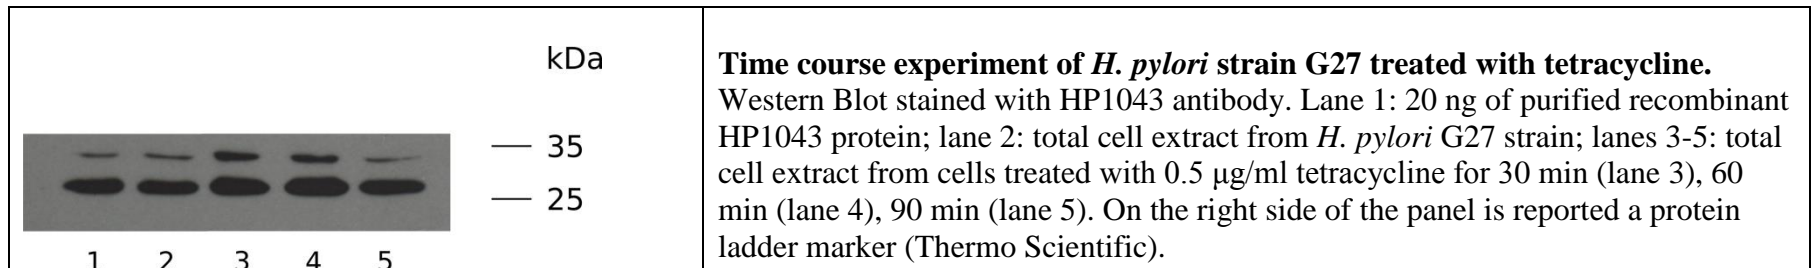

Figure S3

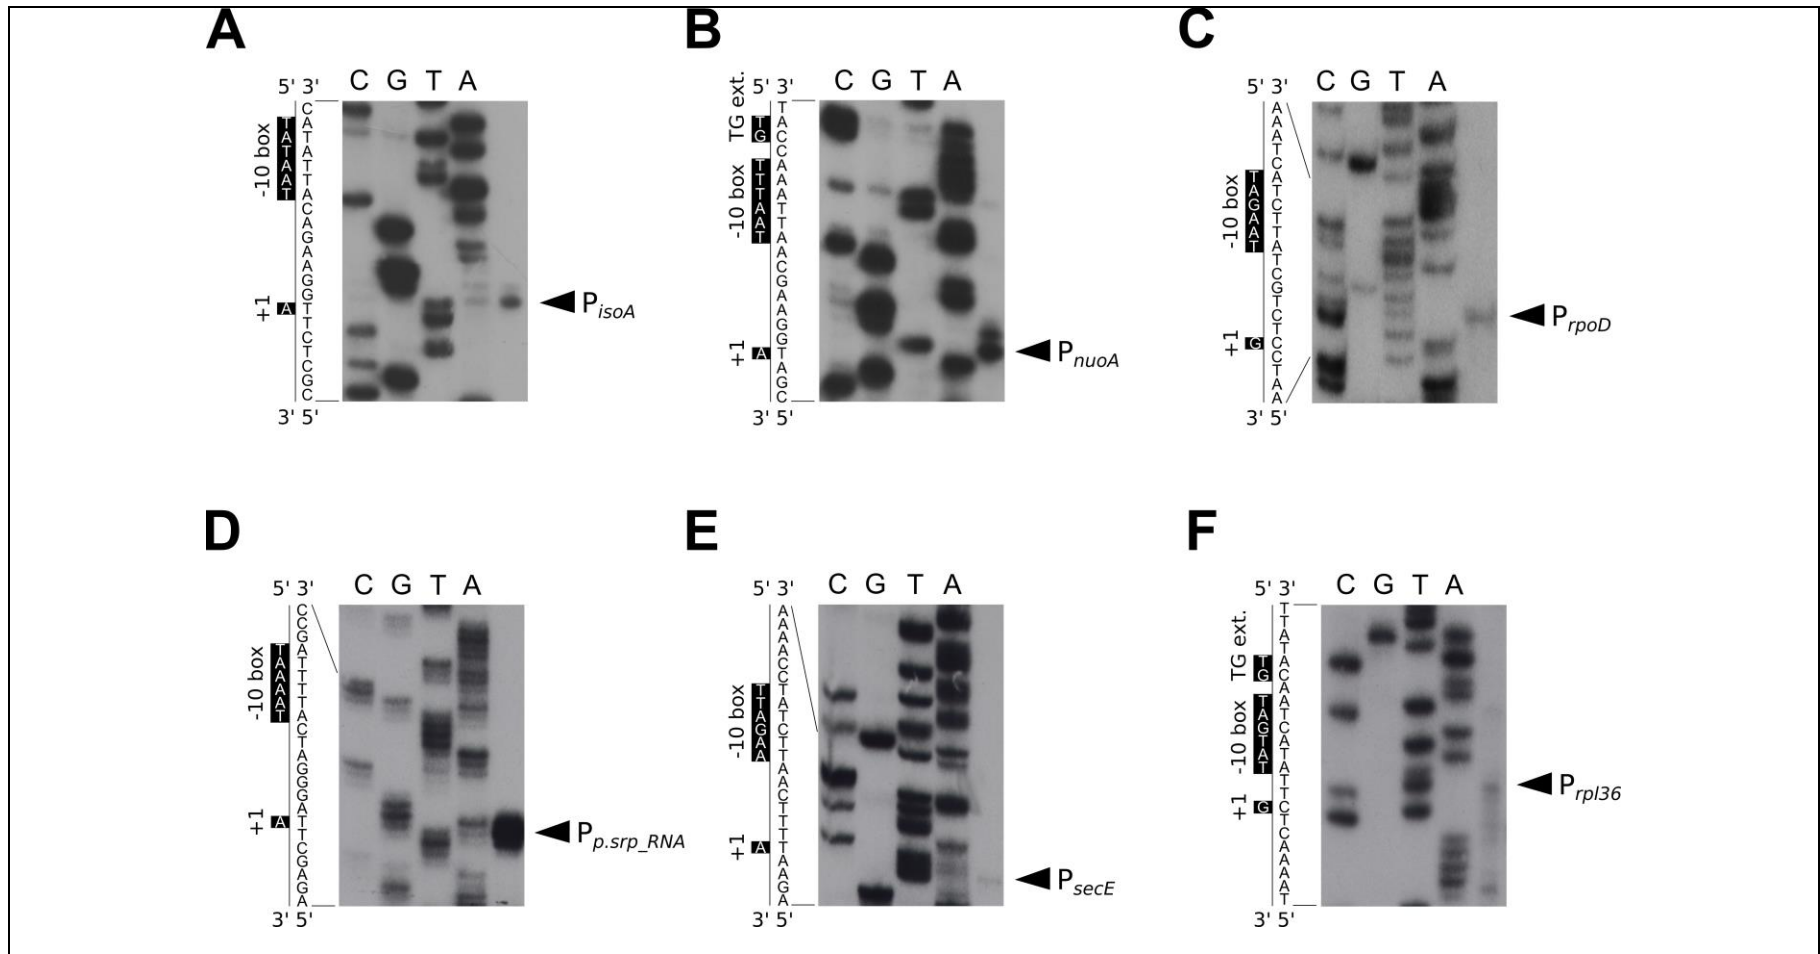

**Determination of transcriptional start sites at selected promoters.** Total RNA (15  $\mu$ g) isolated from *H. pylori* G27 (right lanes in each panel) were hybridized to the radiolabelled oligonucleotides listed in Table S4 and elongated with AMV-reverse transcriptase. Transcriptional start sites ( $P_{isoA}$ , panel A;  $P_{nuoA}$ , panel B;  $P_{rpoD}$ , panel C;  $P_{p.srp\_RNA}$ , panel D;  $P_{secE}$ , panel E,  $P_{rpl36}$ , panel F) are marked with arrows on the right side of each panel. Sequence reactions (C, G, T, A) were performed with the same oligonucleotides as in the respective primer extension experiments. Nucleotide sequences (non-coding strand) with indicated promoter elements (coding strands) are reported in the left side of each panel.

**Table S1**

| ChIP-seq  | Total reads | Mapped  | High quality | High quality alignment rate | Unique  | PBC    | NSC  | RSC  | Tag Quality |
|-----------|-------------|---------|--------------|-----------------------------|---------|--------|------|------|-------------|
| Input-A   | 6749921     | 6688442 | 6669372      | 98,81%                      | 1840414 | 27,60% | 1,02 | 1,33 | 1           |
| Input-B   | 5628590     | 5612021 | 5577598      | 99,09%                      | 2149154 | 38,53% | 1,02 | 1,48 | 1           |
| wt_HsrA_A | 4253809     | 4224030 | 4211750      | 99,01%                      | 1728110 | 41,03% | 1,04 | 3,14 | 2           |
| wt_HsrA_B | 2183573     | 2164304 | 2160932      | 98,96%                      | 1054816 | 48,81% | 1,08 | 1,78 | 2           |

PBC=PCR Bottleneck Coefficient

NSC=Normalized Strand Cross-correlation coefficient

RSC=Relative Strand Cross-correlation coefficient

| IDR consistency table | Self-consistency (THS 0.02) | Pooled sample consistency (THS 0.0025) | Consistency between replicates(THS 0.02) |
|-----------------------|-----------------------------|----------------------------------------|------------------------------------------|
| wt_HsrA_A             | 63                          |                                        | 37                                       |
| wt_HsrA_B             | 59                          |                                        |                                          |
| Pool wt_HsrA A+B      |                             | 67                                     |                                          |

| RNA-seq       | Raw reads | Reads mapped | HQ reads | rRNA % | mRNA % | tRNA % | Gene coverage statistics |                                     |                                      |
|---------------|-----------|--------------|----------|--------|--------|--------|--------------------------|-------------------------------------|--------------------------------------|
|               |           |              |          |        |        |        | 1 read covered genes %   | Min reads covering 90% of the genes | Genes covered at least 50% in lenght |
| WT_HsrA_A     | 3499963   | 3445392      | 3317263  | 4%     | 84%    | 1%     | 99,75%                   | 48                                  | 96,92%                               |
| WT_HsrA_B     | 2126283   | 2089097      | 1989882  | 4%     | 83%    | 1%     | 99,50%                   | 28                                  | 95,60%                               |
| WT_HsrA_TET_A | 4077701   | 4010762      | 3866045  | 2%     | 87%    | 1%     | 99,50%                   | 38                                  | 96,73%                               |
| WT_HsrA_TET_B | 4927313   | 4849688      | 4695595  | 2%     | 87%    | 1%     | 99,43%                   | 49                                  | 97,42%                               |

**Table S2**

**Extended peak annotation**

| Peak_name           | Leader gene annotation |            |                 | Downstream components of the operon                                          | n. of controlled genes |
|---------------------|------------------------|------------|-----------------|------------------------------------------------------------------------------|------------------------|
|                     | Annotation             | Gene_Name  | 26695_locus_tag | Full operon (Door predictions)                                               |                        |
| Peak_1              | HPG27_RS01660          | nadE       | HP0329          | HPG27_RS01655(lpxK)                                                          | 2                      |
|                     | HPG27_RS01670          | ilvC       | HP0330          | HPG27_RS01675(minD), HPG27_RS01680(minE), HPG27_RS01685(dprA), HPG27_RS01690 | 5                      |
|                     | HPG27_RS01665          | tRNA-Arg   | -               |                                                                              | 1                      |
| Peak_2              | HPG27_RS07575          | tRNA-Phe   | -               |                                                                              | 1                      |
| Peak_3              | HPG27_RS07130          | 16SrRNA    | -               |                                                                              | 1                      |
| Peak_4 <sup>§</sup> | HPG27_RS07980          | -          | -               | HPG27_RS07985                                                                | 2                      |
| Peak_5              | HPG27_RS02200          | tRNA-Pro   | -               |                                                                              | 1                      |
| Peak_6              | HPG27_RS05775          | fldA       | HP1161          | HPG27_RS05770(ybeY)                                                          | 2                      |
| Peak_7              | HPG27_RS06075          | atpE       | HP1212          |                                                                              | 1                      |
| Peak_8              | HPG27_RS05690          | 16SrRNA    | -               |                                                                              | 1                      |
| Peak_9              | HPG27_RS05410          | galE       | HP0360          |                                                                              | 1                      |
|                     | HPG27_RS05415          | tRNA-Ile   | -               | HPG27_RS05420(tRNA-Ala)                                                      | 2                      |
| Peak_10             | HPG27_RS05865          | nupC       | HP1180          | HPG27_RS05860(deoB)                                                          | 2                      |
|                     | HPG27_RS05875          | -          | HP1181          | HPG27_RS05880                                                                | 2                      |
|                     | HPG27_RS05870          | tRNA-Met   | -               |                                                                              | 1                      |
| Peak_11             | HPG27_RS07945          | flgG2,flgG | HP1585          |                                                                              | 1                      |
| Peak_12             | HPG27_RS05725          | rpS16,rpsP | HP1151          | HPG27_RS05710(trmD), HPG27_RS05715(rimM), HPG27_RS05720                      | 4                      |
| Peak_13             | asRNA_HPG27_RS06840    | -          | -               |                                                                              | 1                      |
|                     | HPG27_RS06835          | -          | -               |                                                                              | 1                      |
| Peak_14             | HPG27_RS06000          | secE       | HP1203a         | HPG27_RS05985(rpl1), HPG27_RS05990(rpl11), HPG27_RS05995(nusG)               | 4                      |

|         |                                   |                |        |                                                                                                                                                               |    |
|---------|-----------------------------------|----------------|--------|---------------------------------------------------------------------------------------------------------------------------------------------------------------|----|
| Peak_15 | HPG27_RS00470                     | fabD           | HP0090 | HPG27_RS00465(mtn)                                                                                                                                            | 2  |
|         | HPG27_RS00475                     | tRNA-Ser       | -      |                                                                                                                                                               | 1  |
| Peak_16 | HPG27_RS06065                     | tRNA-Leu       | -      |                                                                                                                                                               | NA |
|         | HPG27_RS06070                     | tRNA-Leu       | -      |                                                                                                                                                               | NA |
| Peak_17 | HPG27_RS05390                     | nrdB,nrdF      | HP0364 | HPG27_RS05395(pcm), HPG27_RS05400,<br>HPG27_RS05405(truA)                                                                                                     | 4  |
|         | HPG27_RS05385                     | tRNA-Leu       | -      |                                                                                                                                                               | 1  |
| Peak_18 | HPG27_RS01920                     | tRNA-Ser       | -      |                                                                                                                                                               | 1  |
| Peak_19 | asRNA_HPG27_RS03935               | -              | -      |                                                                                                                                                               | 1  |
| Peak_20 | HPG27_RS06140                     | hemN2,hem<br>N | HP1226 |                                                                                                                                                               | 1  |
|         | HPG27_RS06145                     | cytc553        | HP1227 |                                                                                                                                                               | 1  |
| Peak_21 | isoA                              | isoA           | -      |                                                                                                                                                               | 1  |
| Peak_22 | cncR1_Hpnc2630                    | cncR1          | -      |                                                                                                                                                               | 1  |
| Peak_23 | HPG27_RS07585                     | dnaA           | HP1529 |                                                                                                                                                               | NA |
| Peak_24 | HPG27_RS06525                     | rpl36,rpmJ     | HP1297 | *HPG27_RS06500(rpl17,rplQ),<br>HPG27_RS06505(rpoA-pseudogene),<br>HPG27_RS06510(rps4,rpsD),<br>HPG27_RS06515(rps11),<br>HPG27_RS06520(rps13,rpsM)             | 6  |
| Peak_25 | HPG27_RS00460                     | rpoD           | HP0088 | HPG27_RS00445, HPG27_RS00450(mqo),<br>HPG27_RS00455                                                                                                           | 4  |
| Peak_26 | asRNA_HPG27_RS05530(<br>Hpnc3560) | -              | -      |                                                                                                                                                               | 1  |
| Peak_27 | HPG27_RS00390                     | tRNA-Val       | -      |                                                                                                                                                               | 1  |
| Peak_28 | HPG27_RS05215                     | rps1,rpsA      | HP0399 | HPG27_RS05220, HPG27_RS05225(serA),<br>HPG27_RS05230(ubiD), HPG27_RS05235,<br>HPG27_RS05240, HPG27_RS05245(cheV),<br>HPG27_RS05250(cheA), HPG27_RS05255(cheW) | 9  |
| Peak_29 | putative_SRP_RNA                  | -              | -      |                                                                                                                                                               | 1  |
|         | HPG27_RS00110                     | -              | HP0018 |                                                                                                                                                               | 1  |
| Peak_30 | HPG27_RS06040                     | hetA           | HP1206 |                                                                                                                                                               | 1  |
| Peak_31 | HPG27_RS06285                     | bioC           | HP1254 |                                                                                                                                                               | 1  |

|         |               |            |        |                                                                                                                  |    |
|---------|---------------|------------|--------|------------------------------------------------------------------------------------------------------------------|----|
|         | HPG27_RS06290 | secG       | HP1255 | HPG27_RS06295(frr), HPG27_RS06300(pyrE),<br>HPG27_RS06305, HPG27_RS06310                                         | 5  |
| Peak_32 | HPG27_RS05705 | rpl19,rplS | HP1147 |                                                                                                                  | 1  |
| Peak_33 | HPG27_RS03405 | flgR       | HP0703 |                                                                                                                  | NA |
| Peak_34 | HPG27_RS02330 | hofC       | HP0486 |                                                                                                                  | 1  |
| Peak_35 | HPG27_RS00055 | tRNA-Lys   | -      |                                                                                                                  | NA |
| Peak_36 | HPG27_RS00165 | -          | HP0030 | HPG27_RS00160(bioD)                                                                                              | 2  |
|         | HPG27_RS00170 | uspA       | HP0031 | HPG27_RS00175(clpS), HPG27_RS00180(clpA),<br>HPG27_RS00185(panD), HPG27_RS00190,<br>HPG27_RS00195, HPG27_RS00200 | 7  |
| Peak_37 | HPG27_RS07170 | rpl34,rpmH | HP1447 |                                                                                                                  | 1  |

Total genes of the HP1043 regulon: 92

\$: located on G27 plasmid

\*: inferred membership as rpmJ was absent in DOOR annotation

NA: not apply, non-promotorial peaks

### Table S3

#### Complete list of HrsA peaks individuated by Homer on the IP replicates pool

| Peak_name            | start:end       | score   |
|----------------------|-----------------|---------|
| Peak_1               | 342452:342626   | 33634.2 |
| Peak_2               | 1570125:1570299 | 29290.7 |
| Peak_3               | 1476498:1476672 | 27064.0 |
| Peak_4 <sup>\$</sup> | 1:126           | 26419.0 |
| Peak_5               | 448262:448436   | 24526.6 |
| Peak_6               | 1212453:1212627 | 22077.0 |
| Peak_7               | 1276504:1276678 | 21217.1 |
| Peak_8               | 1194610:1194784 | 20592.6 |
| Peak_9               | 1140440:1140614 | 20533.0 |

|         |                 |         |
|---------|-----------------|---------|
| Peak_10 | 1234366:1234540 | 20239.5 |
| Peak_11 | 1648608:1648782 | 17967.3 |
| Peak_12 | 1198357:1198531 | 17780.6 |
| Peak_13 | 1411804:1411978 | 17187.4 |
| Peak_14 | 1268342:1268516 | 16391.8 |
| Peak_15 | 96262:96436     | 16366.7 |
| Peak_16 | 1275920:1276094 | 15715.5 |
| Peak_17 | 1135651:1135825 | 15701.4 |
| Peak_18 | 395023:395197   | 15492.7 |
| Peak_19 | 829599:829773   | 14406.8 |
| Peak_20 | 1290665:1290839 | 14058.4 |
| Peak_21 | 1576835:1577009 | 13402.5 |
| Peak_22 | 536813:536987   | 13358.6 |
| Peak_23 | 1573020:1573194 | 13228.3 |
| Peak_24 | 1362385:1362559 | 12858.0 |
| Peak_25 | 94349:94523     | 11431.6 |
| Peak_26 | 1163325:1163499 | 11422.2 |
| Peak_27 | 79140:79314     | 11103.6 |
| Peak_28 | 1099169:1099343 | 10857.3 |
| Peak_29 | 16420:16594     | 10304.9 |
| Peak_30 | 1270429:1270603 | 10176.2 |
| Peak_31 | 1318842:1319016 | 9864.0  |
| Peak_32 | 1196544:1196718 | 9212.8  |
| Peak_33 | 722928:723102   | 8986.8  |
| Peak_34 | 478010:478184   | 8089.2  |
| Peak_35 | 4434:4608       | 7929.2  |
| Peak_36 | 31591:31765     | 7905.6  |
| Peak_37 | 1480392:1480566 | 7634.1  |
| Peak_38 | 1180249:1180423 | 7598.1  |
| Peak_39 | 605388:605562   | 7496.1  |
| Peak_40 | 3494:3668       | 7235.6  |
| Peak_41 | 565307:565481   | 7125.7  |



|         |                 |        |
|---------|-----------------|--------|
| Peak_42 | 360164:360338   | 7015.9 |
| Peak_43 | 236202:236376   | 7001.8 |
| Peak_44 | 1193025:1193199 | 6879.4 |
| Peak_45 | 392093:392267   | 6683.2 |
| Peak_46 | 1474916:1475090 | 6673.8 |
| Peak_47 | 1085547:1085721 | 6341.1 |
| Peak_48 | 214697:214871   | 6259.5 |
| Peak_49 | 740257:740431   | 6137.1 |
| Peak_50 | 414584:414758   | 5942.6 |
| Peak_51 | 59460:59634     | 5865.7 |
| Peak_52 | 183858:184032   | 5848.4 |
| Peak_53 | 88918:89092     | 5820.2 |
| Peak_54 | 1027036:1027210 | 5796.6 |
| Peak_55 | 1552719:1552893 | 5732.3 |
| Peak_56 | 1024984:1025158 | 5708.7 |
| Peak_57 | 1441450:1441624 | 5655.4 |
| Peak_58 | 201276:201450   | 5594.2 |
| Peak_59 | 609738:609912   | 5550.3 |
| Peak_60 | 486434:486608   | 5307.0 |
| Peak_61 | 918864:919038   | 5238.0 |
| Peak_62 | 128670:128844   | 5115.6 |
| Peak_63 | 141260:141434   | 4917.9 |
| Peak_64 | 855119:855293   | 4914.7 |
| Peak_65 | 917889:918063   | 4908.5 |
| Peak_66 | 588210:588384   | 4861.4 |
| Peak_67 | 1033394:1033568 | 4839.4 |
| Peak_68 | 1322010:1322184 | 4839.4 |
| Peak_69 | 573065:573239   | 4629.1 |
| Peak_70 | 971584:971758   | 4578.9 |
| Peak_71 | 718664:718838   | 4455.0 |
| Peak_72 | 149265:149439   | 4411.0 |
| Peak_73 | 253325:253499   | 4354.5 |

|          |                 |        |
|----------|-----------------|--------|
| Peak_74  | 966379:966553   | 4246.2 |
| Peak_75  | 1494075:1494249 | 4196.0 |
| Peak_76  | 1300886:1301060 | 4177.2 |
| Peak_77  | 173406:173580   | 4158.4 |
| Peak_78  | 1498857:1499031 | 3977.9 |
| Peak_79  | 1465278:1465452 | 3863.4 |
| Peak_80  | 1100311:1100485 | 3769.2 |
| Peak_81  | 583371:583545   | 3745.7 |
| Peak_82  | 909780:909954   | 3726.8 |
| Peak_83  | 231004:231178   | 3595.0 |
| Peak_84  | 1503126:1503300 | 3584.0 |
| Peak_85  | 1460511:1460685 | 3571.5 |
| Peak_86  | 1431410:1431584 | 3533.8 |
| Peak_87  | 223174:223348   | 3527.6 |
| Peak_88  | 1105721:1105895 | 3524.4 |
| Peak_89  | 599039:599213   | 3515.0 |
| Peak_90  | 1003793:1003967 | 3496.2 |
| Peak_91  | 807829:808003   | 3488.3 |
| Peak_92  | 800631:800805   | 3486.8 |
| Peak_93  | 1155000:1155174 | 3453.8 |
| Peak_94  | 1539595:1539769 | 3449.1 |
| Peak_95  | 726951:727125   | 3389.5 |
| Peak_96  | 34819:34993     | 3344.0 |
| Peak_97  | 597916:598090   | 3312.6 |
| Peak_98  | 658017:658191   | 3138.4 |
| Peak_99  | 551175:551349   | 3097.6 |
| Peak_100 | 1185982:1186156 | 3088.2 |
| Peak_101 | 1466082:1466256 | 3025.4 |
| Peak_102 | 898087:898261   | 2921.8 |
| Peak_103 | 689622:689796   | 2797.9 |
| Peak_104 | 208742:208916   | 2752.4 |
| Peak_105 | 547113:547287   | 2746.1 |

|          |               |        |
|----------|---------------|--------|
| Peak_106 | 67697:67871   | 2531.1 |
| Peak_107 | 874295:874469 | 2145.1 |

\$:located on G27 plasmid

**Table S4**

**Oligonucleotides for probes generation**

| <i>Name</i>  | <i>Sequence (5' to 3')</i>     |
|--------------|--------------------------------|
| 0703FPF      | CCCTTTCAATTGCAAAGCAAAC         |
| 0703FPR      | GCCTTGCAAACCTACCTTTCC          |
| 1203FPF      | GCGTATCTGCTCTTTAATAGG          |
| 1203FPR      | GGTTAGGTCAGTAGCTCC             |
| 1227FPF      | AAATCCAGGCATAACGCTTG           |
| 1227FPR      | GCGGCACAACCTTTTACAAG           |
| sRNA17_18FPF | GATTCTAGTCATGTGAATAAAGCG       |
| sRNA17_18FPR | GGGCTTTCTTCATAATAGAGCG         |
| A1.4FPF      | GGCAAACCTACCTTAAAAGGAG         |
| A1.4FPR      | ACGCCCAAAGTCAAGGAC             |
| 0088FPF      | CTTTAGCTTTATTTTCTGTGTGG        |
| 0088FPR      | TTACCAAACGCAAACAATTGAAAC       |
| 1296FPF      | GCCCAATCCCATAAATATAGGTAAGG     |
| 1296FPR      | GGATGGGAAAGTGATTGAGG           |
| 1260FPF      | GCATCAGGCTCTCAAACCTCC          |
| 1260FPR      | CGCTCTCATTTATTACATTGACCC       |
| 0703HYF      | ATATGGATCCGGGTTGAAGAGATCTTACCC |
| 0703HYR      | CCCAAGAGTATTCTAAAAGGC          |

|              |                                        |
|--------------|----------------------------------------|
| 1203HYF      | ATATGGATCCATACATTAAAAGAATTTTCAATTCTATC |
| 1203HYR      | CCAAAACCGGTTGTTGG                      |
| 1227HYF      | ATATGGATCCCTCTTATTTTCACTTCATTTTTAAGC   |
| 1227HYR      | GCCATTAAAGCGTTTGCG                     |
| 0088HYF      | ATATGGATCCGATACACCTAATCCTCTGC          |
| 0088HYR      | GGTTTGTTTTTACCAAACGC                   |
| sRNA17_18HYF | ATATGGATCCGCTTAGGGATCATTTTAGCC         |
| sRNA17_18HYR | CCGACATCAACAGAACG                      |
| A1.4HYF      | ATATGGATCCGGCAAACGCTCTTGG              |
| A1.4HYR      | GAGCGCTAAAATCAGGG                      |

### Oligonucleotides for qRT-PCR analysis

| <i>Name</i> | <i>Sequence (5' to 3')</i> | <i>Target CDS</i>        |
|-------------|----------------------------|--------------------------|
| 1043RTF     | CAGGGTGC GGACGATTACAT      | HPG27_RS02035            |
| 1043RTR     | AGCCCCAAAACCTCAAACGA       | (HP1043 in 26695 strain) |
| 0088RTF     | GATAAGATACACCTAATCCTCTGCT  | HPG27_RS00460            |
| 0088RTR     | CAAACGCAAACAATTGAAACCCT    | (HP0088 in 26695 strain) |
| 1203RTF     | AGCCCCTAGAGAAAAATCCAAC     | HPG27_RS05995            |
| 1203RTR     | TACGCAACGCGCTTATTTCTG      | (HP1203 in 26695 strain) |
| 1296RTF     | TGTCAAAGAAATGCCTACCGC      | HPG27_RS06520            |
| 1296RTR     | ATGGCAAGGATTGCTGGTGT       | (HP1296 in 26695 strain) |
| 1227RTF     | CGCTTGCCATGGGGTTAAGT       | HPG27_RS06145            |
| 1227RTR     | CTTGTTGGCACCGCTTTTGA       | (HP1227 in 26695 strain) |
| FecA1RTF    | AGCGTGCATGGTGTCAAAC        | HPG27_RS03325            |
| FecA1RTR    | AACTTCCTTGCTCCTCCAGC       | (HP0686 in 26695 strain) |
| frpBRTF     | TGTGAGAGGCATTGAAGACAGGCT   | HPG27_RS04285            |
| frpBRTR     | CGCCTTTGGTAACTTCCACGCTTT   | (HP0876 in 26695 strain) |
| nixARTF     | CTTACATGCTAGGGGCAAAG       | HPG27_RS01865            |

|           |                           |                          |
|-----------|---------------------------|--------------------------|
| nixARTR   | CATAGGCGTTTTTGCCTTGT      | (HP1077 in 26695 strain) |
| tRNA7RTF  | TTGAAGGACAGGTGGGTGAG      | tRNA7                    |
| tRNA7RTR  | TCGAACCCTCGGTAACCTTG      |                          |
| tRNA10RTF | CGCTCAGCCCGTAAACGAC       | tRNA10                   |
| tRNA10RTR | GGCATGCAAAAAGATTACCAAAAAC |                          |
| tRNA26RTF | CAGGTGGTTAGAGCACACCC      | tRNA26                   |
| tRNA26RTR | TCCCAGCTGAGCTAATTCCC      |                          |
| tRNA28RTF | AATCATGGTGTCAAGAGGGGG     | tRNA28                   |
| tRNA28RTR | AGCTGGTTTAGAGCGCTGG       |                          |

### **Oligonucleotides for primer extensions analysis**

| <i>Name</i> | <i>Sequence (5' to 3')</i> | <i>Target promoter</i> |
|-------------|----------------------------|------------------------|
| 1203FPF     | GCGTATCTGCTCTTTAATAGG      | P <sub>secE</sub>      |
| A1.4FPF     | GGCAAACCTACCTTAAAAGGAG     | P <sub>IsoA</sub>      |
| 1260FPF     | GCATCAGGCTCTCAAACCTCC      | P <sub>nuoA</sub>      |
| SRP_RNA p3  | CATTTTGAAGCACTCC           | P <sub>p.srp_RNA</sub> |
| 0088 p4     | CCATAAAATAAGAACCCATGC      | P <sub>rpoD</sub>      |
| 1296 p2     | CACATCTTTTTCACTGATGG       | P <sub>rpl36</sub>     |
